# Supplementary material for: Adipose-derived mesenchymal stem cells may reduce intestinal epithelial damage in ulcerative colitis by communicating with macrophages and blocking inflammatory pathways: an analysis in silico
Source: PubMed Central journal article supplement (PMC9004563; doi:10.18632/aging.203964), 2022-03-22
Supplement: aging-14-203964-s002.pdf [file aging-14-203964-s002.pdf]

## SUPPLEMENTARY TABLES

**Supplementary Table 2. The receptor and ligand pairs of macrophages and enterocytes of different subtypes.**

| Ligand | Receptor | Cell_from_mean_exprs | Cell_from   | Cell_to_mean_exprs | Cell_to                |
|--------|----------|----------------------|-------------|--------------------|------------------------|
| VIM    | CD44     | 392.9345568          | 1           | 0.639843532        | Macrophages            |
| COL1A1 | CD44     | 214.0378432          | 1           | 0.639843532        | Macrophages            |
| COL1A2 | CD44     | 117.4523317          | 2           | 0.639843532        | Macrophages            |
| FN1    | CD44     | 76.85261818          | 2           | 0.639843532        | Macrophages            |
| COL1A1 | CD36     | 135.694858           | 0           | 0.340597932        | Macrophages            |
| APP    | CD74     | 1.95886416           | 0           | 17.00223526        | Macrophages            |
| COL1A1 | CD44     | 31.21820918          | 3           | 0.639843532        | Macrophages            |
| FN1    | PLAUR    | 26.22723853          | 3           | 0.566359318        | Macrophages            |
| PKM    | CD44     | 23.19493477          | 0           | 0.639843532        | Macrophages            |
| VCAN   | CD44     | 7.218096458          | 1           | 0.639843532        | Macrophages            |
| FGF2   | CD44     | 4.701765157          | 0           | 0.639843532        | Macrophages            |
| THBS1  | CD36     | 6.203453569          | 0           | 0.340597932        | Macrophages            |
| CTGF   | ITGB2    | 2.679834462          | 3           | 0.664291702        | Macrophages            |
| SPON2  | ITGB2    | 2.673404425          | 2           | 0.664291702        | Macrophages            |
| ANXA1  | FPR3     | 6.580932675          | 2           | 0.250209556        | Macrophages            |
| TGFB1  | CXCR4    | 4.411153791          | 1           | 0.293657446        | Macrophages            |
| THBS1  | CD36     | 3.579759217          | 3           | 0.340597932        | Macrophages            |
| GAS6   | AXL      | 7.75743349           | 1           | 0.134534786        | Macrophages            |
| GAS6   | AXL      | 4.842440522          | 0           | 0.134534786        | Macrophages            |
| HLA-B  | CANX     | 1.37237145           | 0           | 0.35582565         | Macrophages            |
| CXCL12 | CXCR4    | 1.493169609          | 0           | 0.293657446        | Macrophages            |
| CSF1   | CSF1R    | 0.836543053          | 2           | 0.289466331        | Macrophages            |
| CSF1   | CSF1R    | 0.587797391          | 0           | 0.289466331        | Macrophages            |
| PROS1  | AXL      | 0.358109184          | 2           | 0.134534786        | Macrophages            |
| ICAM3  | ITGB2    | 0.062829195          | 3           | 0.664291702        | Macrophages            |
| VCAN   | ITGB1    | 0.654512434          | Macrophages | 0.462867012        | Best4+ Enterocytes     |
| VCAN   | ITGB1    | 0.654512434          | Macrophages | 0.4375             | Enterocytes            |
| VCAN   | ITGB1    | 0.654512434          | Macrophages | 0.498440424        | Immature Enterocytes 2 |

**Supplementary Table 3. The expression levels of the differentially expressed receptor or ligand genes obtained in bulk data through single cell analysis.**

| <b>Symbol</b> | <b>LogFC</b> | <b>AveExpr</b> | <b>t</b>   | <b>P.Value</b> | <b>adj.P.Val</b> | <b>B</b>   |
|---------------|--------------|----------------|------------|----------------|------------------|------------|
| ITGB1         | 0.014940634  | 3.782862       | 2.2946137  | 0.026785722    | 0.146494886      | -4.382364  |
| CD44          | 0.1351186    | 3.507543       | 5.180855   | 5.81345E-06    | 0.000540562      | 3.604434   |
| VCAN          | 0.2244977    | 2.672022       | 3.40536    | 0.001458855    | 0.01869735       | -1.709587  |
| CD4           | 0.08734719   | 2.941532       | 2.664814   | 1.09E-02       | 0.077302676      | -3.5718828 |
| ITGB2         | 0.22633679   | 3.022593       | 3.041501   | 0.004032696    | 0.03837442       | -2.66088   |
| AXL           | 0.150793     | 2.925003       | 2.495249   | 0.01657418     | 0.1042333        | -3.954259  |
| CANX          | 0.04339978   | 3.655007       | 5.314411   | 3.75E-06       | 0.000410103      | 4.031727   |
| PLAUR         | 0.1633127    | 2.991897       | 3.309774   | 0.001915449    | 0.02262415       | -1.96566   |
| CD36          | -0.1378495   | 2.660956       | -2.070367  | 0.04456048     | 0.2074994        | -4.827498  |
| HLA-A         | -0.003592468 | 3.834781       | -0.467279  | 0.6426995      | 0.9354278        | -6.784791  |
| HLA-B         | -0.01278865  | 3.844941       | -0.8690066 | 0.3897497      | 0.7887466        | -6.515917  |
| HLA-C         | -0.01500723  | 3.70149        | -0.9425641 | 0.3512585      | 0.7486185        | -6.449699  |
| CXCR4         | 0.1313991    | 3.17712        | 1.456362   | 0.1526787      | 0.4684196        | -5.846819  |
