# Supplementary material for: Adipose-derived mesenchymal stem cells may reduce intestinal epithelial damage in ulcerative colitis by communicating with macrophages and blocking inflammatory pathways: an analysis in silico
Source: Aging (Albany NY). 2022 Mar 22;14(6):2665–77. doi: 10.18632/aging.203964 (PMC9004563; doi:10.18632/aging.203964)
Supplement: Supplementary Table 1 [file aging-14-203964-s001.xlsx]

## Sheet: Sheet1
Supplementary Table 1. The differentially expressed genes in UC patients and controls.
symbol
PIK3CG
RNFT2
ZNF45
ZNF461
ZNF430
ZNF382
ZNF470
ZNF449
ZNF324
ZNF404
ZNF439
ZNF354A
ZNF335
ZNF366
ZNF334
ZNF432
FAM63B
ZNF391
LINC00896
ZNF445
ZNF394
ZNF37A
ZNF646
ZNF30
SIKE1
ZNF471
POLK
PIK3R1
DNAAF3
RP11-258C19.7
RP11-255C15.4
DMWD
ZNF446
ARHGEF9
DMTF1
CORO2A
HTT
ZNF398
CASC4
PPP1R13L
IGHA2
ZNF329
ZNF497
RP11-305L7.3
MED11
HELQ
METAP1
AP000350.5
CFDP1
RP11-290C10.1
SLC35A2
ZNF33A
AC084809.3
DNAH1
FAM72C
ZNF502
ZNF385D
RP11-1348G14.4
ERG
KHDC1
C11orf21
CCL19
TRAPPC2P1
PARS2
CRYZ
LILRA5
ZNF429
C11orf54
DNAAF1
L3MBTL1
GGT6
KTN1-AS1
DMPK
ZNF621
RP11-160H22.3
ZNF852
C11orf68
PLEKHF1
ZNF462
C16orf74
GAPVD1
BX088651.1
ZNF385C
IPMK
C11orf65
FRMD8
GAR1
C11orf53
C11orf71
RP11-428J1.5
RP11-258C19.5
SAP30
MTRNR2L11
RAPGEF3
LA16c-OS12.2
DDX11-AS1
AC074212.5
C10orf99
2022-09-11
RBAK
RN7SL102P
PPP1R16A
ARHGAP5-AS1
KRIT1
CCDC34
RP11-466F5.8
RP11-1069G10.1
ERICH1
ITGAX
RP11-473M20.16
RP11-1020A11.2
SEC14L6
PPP2R5A
ZNF772
RUNX1T1
LGALS2
PPP1R3F
CACNA2D4
SGPP2
RBBP6
GART
ZNRD1-AS1
CFD
NOTCH3
C18orf54
C17orf51
LEF1-AS1
RP11-356J5.12
C12orf54
SFTPD
MET
POC5
FRMD5
MRPL34
RP5-1021I20.1
MFSD7
KPTN
ZNF358
LIG4
C11orf80
COL28A1
RYR1
MRPL35
ZNF331
PSMD2
RP11-867G23.8
SERTAD2
C17orf85
DIO2
ANGPT1
SREK1
CTB-175P5.4
LNX1
ISCA2
RP11-360L9.4
SPTLC3
NXPH4
PPP1R8
LINC01003
CAPN12
COX7A1
PGM3
CTD-3247F14.2
ALDH1A2
NETO2
SLMO2
RN7SL317P
SLC2A5
RP11-1379J22.2
RETNLB
ZNF385A
CUX1
FZD5
RP11-214C8.2
ZNF625
SLC25A10
GIN1
MYO10
SLC25A21
RP11-398K22.12
SEC16A
AJ239322.1
B3GNT7
IFT80
KCNH6
GPC4
RP11-91J19.4
PLCL2
LINC00672
GIGYF2
RP11-195F19.9
PPP1R3C
PPP2R5B
CYB5RL
RP11-162A12.2
TMEM27
SLC19A3
HRCT1
ZNF518B
SBSPON
ABCC4
RP3-508I15.14
LINC00899
NR1I2
CBY1
GPR27
APCDD1
CTD-2228K2.5
LINC00924
LHX4
PPP1R3E
CHKA
LGALS9B
RIF1
PPP2R1B
RP4-635E18.7
SAPCD1-AS1
RP11-435O5.2
GPR107
MYRFL
FAM228B
SGSH
CTD-3025N20.3
GRIPAP1
RP11-399K21.13
FGFR4
GPALPP1
SLX4
NOS3
IQCG
ATPAF2
RP11-257I14.1
RP11-98D18.9
PPP2CB
CTD-2313N18.5
AC004463.6
GMNN
FFAR2
ERGIC1
RP11-768B22.2
EXOSC3
HSD11B1L
CYTH2
PPP1R3D
SH2B3
PPP2R1A
FZD3
GNG12
LPAR3
CENPJ
CD33
PPP6R2
FTO
ZNF81
CNTFR
BGN
SPTY2D1-AS1
HS6ST2
CGREF1
SMAD5-AS1
C10orf95
POF1B
GLT8D2
FAM13C
RP11-297B17.3
STRIP1
RP11-255G21.1
RPA4
FRAT1
EXOSC2
AVPI1
DRAM1
DLGAP1
REV1
ARL10
RHOC
SCML1
PGD
ST3GAL5
PSEN1
POSTN
LINC00900
C11orf1
PPP1R14C
CCDC151
OSCAR
RP11-548H3.1
PKD1L1
PPP2CA
LGALS9
CCND2
CTD-2085J24.4
C4BPB
IGHV3-30
SLC25A4
RP11-349A22.5
PCBD1
AC004528.4
RP11-315I20.1
CD200R1
PPP2R2A
GPC6
GUCY1B3
ANGPTL2
LINC00944
MT1A
CENPF
GGACT
NEDD4L
DLST
SGSM3
PEAR1
CTD-2368P22.1
RP11-401F2.3
RP11-41O4.1
AXIN2
KCNAB2
RNF168
CDCA8
CYS1
SLC39A2
SH3PXD2A
SH3KBP1
PPP1R14B
CPSF3L
SLC12A8
PARPBP
SGMS2
MRPL33
CYBRD1
CHD1
RP11-316P17.2
MRC2
DNA2
C20orf144
NAT1
LINC00883
PGAP3
IKBKAP
C11orf49
PSPC1
RP11-96B5.3
CAPN7
RP11-712L6.5
RP11-395B7.4
RP11-29B2.5
PHYH
IRF4
PPP1R26
CTB-131B5.5
ASMTL
BHLHE41
RP11-340F14.5
HARBI1
SLC25A23
DET1
MT-ATP8
MTPN
RP11-539L10.3
NXPE4
NSG1
RP11-417J8.6
PLK4
C2orf74
EXOC3L1
RP11-473M20.14
CXorf65
FLJ27365
CORT
GGNBP2
SNAI3-AS1
SMOX
RAB6B
KCNH2
SLC2A12
C11orf52
MTMR3
CFH
AC004951.6
SAPCD2
ITGAV
FRMD1
DPH6
ALDH1L2
GPR20
MTO1
RP4-630A11.3
CTD-3051D23.4
FBXL22
ERBB3
ERLIN1
RP11-410K21.2
PPP1R15B
HBA2
IRF2
C18orf25
SCAP
BUB1B
RIT1
SLC25A44
CTD-2203K17.1
RP11-800A3.4
SIDT1-AS1
HIST1H1D
SDPR
SMC3
ARL14
SCAF1
RN7SL753P
ASF1B
SIPA1
RTTN
SEC14L1
NUP205
B3GNT9
LINC00689
POU2AF1
RP11-539L10.2
RP11-708J19.1
SEC14L2
KIF11
GGA3
MTMR9
GGA1
GGA2
CYB561
GOT1
PPIP5K2
PPP1R7
ZNF85
RP11-497K21.1
NOP9
ATP2A3
ZNF32
RP11-1E4.1
HMGN4
PRKCDBP
ZNF578
CPA3
MAP10
RPH3AL
RN7SL200P
SC5D
RP11-109G23.3
CCL8
PPP2R5D
NSMAF
RP11-95P2.3
RP11-755F10.1
NEK9
RCHY1
RP11-778D9.12
ZNRF2
SAMD10
RP11-525A16.4
BGLAP
ROBO1
API5
BDKRB1
ST3GAL3
PEPD
PBX4
KIF3A
PLOD1
HTR3A
BLOC1S4
HRSP12
CHD9
F8
RP11-48B3.4
SLC25A12
PRKRIP1
SARM1
CHST14
UBE2C
LIG3
EFCAB4B
AGAP8
CHCHD6
CNEP1R1
RP1-166H4.2
LINC00694
MTUS2
IGF1R
MSC
RP4-666F24.3
RBP1
ZNF737
IL12RB2
AC004854.4
ZSCAN20
PBRM1
GATC
CXorf40B
RP11-344N10.5
SIN3B
SH2B1
RP11-195F19.5
PBK
CHIT1
PPP1R9A
FILIP1
DDX54
DLX4
RP4-622L5.7
SLC39A7
CCDC28A
KLRB1
IL7R
RPL39
TNFAIP3
CREM
IL32
EIF3E
CD7
PASK
TIGIT
RP5-1028K7.2
LIMD2
C9orf16
ICA1
SOD1
PTPRC
CD27
PDCD1
SPOCK2
EVL
STK17A
TMEM66
TNFRSF4
TMBIM6
PPP1CC
IL2RG
EIF3F
HMGN1
NDUFB2
HSPA5
GRAP2
DRAP1
EMP3
CKLF
TRMT112
ALOX5
C3AR1
RNA18S5
MT2A
CFL1
PDIA3
NFKBIA
SLC45A3
CTSW
ACTR3
PSAP
LEO1
IFITM3
TMEM176B
NDUFB8
C1orf186
ATP5H
BACE2
HS3ST1
TAGLN2
MIF
SNX3
PARK7
ATP6V0B
TUBA1A
LMNA
RTN4
ATP6V0E1
GSTP1
ALDOA
SMYD3
SFT2D1
NEDD8
PSMA2
BEX4
PSMB6
ATP5G1
TMEM50A
HPGD
SAMSN1
HSP90AA1
ITM2B
GNLY
KLRD1
CST7
AC092580.4
GZMB
OSTF1
CD3G
ZFP36L1
ABI3
RAC2
LAG3
ARPC3
LSP1
AMICA1
RORA
CAPZB
CTSC
IL17A
PPP1CA
ACAP1
UQCR11
ENO1
CCL20
DDIT4
CIB1
SELT
PTPN7
RARRES3
RRM2
BIRC5
SMIM14
ZWINT
SNRNP25
NASP
YWHAH
DCK
IRF8
MOB1A
MYL12A
WDR1
CLTA
CENPM
AURKB
LCP1
PSMB8
ARPC4
DNMT1
ANP32E
CDC20
HNRNPM
SYPL1
UBE2T
GRHPR
CCT5
SMS
XRCC6
TOP2A
PGK1
UBE2A
PGAM1
TKT
FAM49B
CCNB1
STX7
DTYMK
FEN1
CCND3
DNAJC8
BCL2L12
RAC1
PA2G4
CCT2
NUDT1
KHDRBS1
TUBA1C
CD22
CAPZA1
DBNL
SSRP1
IFI16
ARPC5L
EIF3M
HMGB3
SMC4
TMPO
MKI67
HNRNPA1
PGLS
PAK1
CTSZ
SNRPF
FAM111A
CDC37
SPATS2L
CLTB
MMP12
CENPN
LMNB1
2022-09-02
SLC7A7
H2AFX
RBMX
VASP
POLR2G
SET
SYK
TMX1
PPIF
PTGES3
KIF22
VPS35
RTFDC1
HNRNPU
GCA
MAGOH
PSMA1
IER5
CANX
PSMD14
SCPEP1
NONO
SSBP1
RAB8A
MAPRE1
S100B
GNAS
MIR4435-1HG
NUDC
LIMS1
KIAA0101
CALM3
TYMS
DEK
ANP32B
CKS1B
HN1
BUB3
CARHSP1
GMFG
YWHAQ
NUSAP1
LSM4
HNRNPA3
PTTG1
PSMA7
PCNA
H2AFY
TUBB4B
FABP5
ATP5J2
TK1
HNRNPK
ATP5B
NUCKS1
ILF2
CACYBP
SNRPG
RPA3
SNRPD1
CBX3
CAP1
ANAPC11
PSMA4
ATP5G3
RALY
COX6C
HIST1H4C
PPP4C
MZT2B
HNRNPC
SERBP1
ERH
RHOA
PSMB3
TRAPPC1
C12orf75
CKS2
DDX39A
U2AF1
MCM7
TBC1D10C
ARHGDIA
BANF1
UBE2I
RBX1
NAP1L1
CDK1
COX5A
PSMA5
PCBP1
ABRACL
SRSF2
HNRNPA0
TPM4
VDAC3
2022-09-01
DNAJC9
PSMD8
UBE2L3
ENSA
PRDX2
LSM2
EBP
PIN1
TALDO1
SRP9
MRPL51
LSM5
SHFM1
ATPIF1
AP2S1
TXN
MZT2A
SLC25A3
PSMB2
ARL6IP1
MDH1
ATP5A1
IDH2
RAD21
COPE
TMEM106C
YWHAB
UQCR10
KPNA2
GNG5
GSTO1
DBI
BLOC1S1
NDUFS5
UBE2D2
CNN2
ANXA5
RAP1B
SUMO1
CD247
ITM2A
EID1
ATP5J
PCBP2
ATP5F1
TBCB
CDKN3
MAD2L1
CCDC167
NDUFA6
CSNK2B
TCEB2
PMVK
SMC2
BATF
EWSR1
FDPS
EIF2S2
SIT1
LRRFIP1
UBE2N
AP2M1
UCP2
LSM3
NDUFA12
C20orf24
PPP1R18
FYN
COX6B1
GIMAP7
C14orf166
CENPW
GNB2
PRELID1
LAPTM5
UBE2S
PRDX3
ARF6
CD6
FYB
RBM8A
RNPS1
NDUFS6
TXNDC17
PSMC5
PSMB1
RBBP7
SSNA1
SNRNP70
RPS27L
ADRM1
SLBP
CCT8
UQCRFS1
NDUFB9
ARF1
NDUFA2
HMGA1
SAP18
NUDT21
2022-09-06
STOML2
NDUFS8
NUDT5
NOP10
NDUFA11
HNRNPDL
SKA2
PSMC3
SNRPB2
SF3B5
SLC9A3R1
VPS29
LINC00152
NAP1L4
SUMO3
GTF3A
PSMD4
HCLS1
PSMG2
HSPB11
TRA2B
POLR2J
TFDP1
ITGB1BP1
RNF167
NDUFB3
MDH2
AURKAIP1
NDUFA13
STRA13
BSG
RGS10
COX7A2
BRK1
TAP1
FKBP8
ATP5O
EIF3L
EIF3D
NDUFB10
WDR83OS
ITGAE
EIF3I
UQCC2
PPA1
WIPF1
SFPQ
ISG15
YWHAZ
SKP1
ANXA2
RPSAP58
NDUFB11
SNRPA1
CCT3
DCTN3
CCT4
MYEOV2
SAE1
BAX
EIF4H
SUB1
PRDX6
CCNA2
VDAC1
BUD31
TCEB1
SNRPE
TMEM160
SRI
MORF4L1
HPRT1
MRPL23
GTF3C6
SNRPC
MRPL41
PRR13
UQCRH
CDT1
RHEB
MPC2
CYC1
SF3B14
TUBA4A
CBX5
C1QBP
MYH9
GHITM
COX5B
ATP5D
CENPA
RAB27A
PSMD7
ARHGEF1
NHP2L1
HNRNPR
CHMP2A
SRSF11
GTF2A2
MRPS21
PUF60
ANXA6
CCDC109B
NDUFB1
EIF4G2
ACP1
PRKCH
GBP2
HNRNPAB
PCMT1
2022-09-09
IFT122
ZNF630
C1QB
RAD1
RNF14
PIK3C2B
LCP2
MYLIP
MT-TH
COQ2
PIK3R5
AC002451.3
ENO1-IT1
SDCBP2
NSL1
ZNF717
PIK3R4
LPCAT4
PIK3R2
PLSCR1
GPR34
FAF1
LIN28A
DACT1
RLF
MSMP
DMAP1
ZNF330
GDF15
RP11-395B7.2
KIF2C
RP11-171I2.5
GIMAP8
DMD
MVB12A
LILRB4
NMNAT1
FAM73A
ZNF605
GYLTL1B
RP11-290F24.6
RP11-588K22.2
CC2D2A
CRYM-AS1
SGMS1
GMDS-AS1
RP11-574K11.29
ZNF408
LDOC1
NTMT1
COL11A2
CEBPG
PPP3CC
LIMS2
RP11-399O19.9
DLK2
KHNYN
KIAA1715
SAV1
AC004791.2
INTS5
C7orf43
CXorf56
KIAA1109
FOXF2
POGLUT1
RHEBL1
DNM3
RP11-690I21.2
SNTA1
CTC-462L7.1
GLIS2
RP4-739H11.4
NOS2
FAM71F2
ANKRD13B
PTPRB
LINC00958
GFPT1
KLLN
PHB2
CTC-205M6.5
SH2D1A
RP11-49C24.1
ZSWIM1
HS3ST3B1
SCAMP5
RP11-473M20.7
BRAT1
GPR39
RAB8B
KDM4A
BRE
RBM20
FAM41C
RNF148
GHDC
RP11-206L10.10
RP11-714L20.1
SNRPD3
CCDC106
PDCD2L
RP5-837J1.2
C9orf142
POLD3
SNCAIP
WBP5
TNRC6C
LEAP2
LIMCH1
PSPN
RP11-251G23.5
CD46
PFKP
PHKB
RSPRY1
PHF20L1
CHCHD5
RP11-770J1.5
CD2AP
MT-TS1
DAB2IP
RP11-299H22.1
SMG8
RP1-39G22.7
CCNB2
OSCP1
KMT2C
CYB561D1
EREG
SLC25A33
FBXL12
HILPDA
ZNF555
CHCHD1
PRKACA
ST6GALNAC1
NAA60
KCTD1
PHTF1
CUTC
AGAP10
SH3RF3-AS1
ZNF571-AS1
RUFY2
SIL1
PXMP2
RP11-38L15.2
GTF3C4
C15orf52
NIT1
RP11-579E24.1
CLDN11
ATP1A2
FAM3A
KLHL36
PGPEP1
RP11-421M1.8
SLFN12L
GIMAP4
AOC1
RP11-492E3.2
PTRH2
DIRAS1
FITM1
RP11-44N22.3
SMG7-AS1
BMS1P20
DLEC1
AC068499.10
FKBP9
RASD2
SRD5A3
PSKH1
RP11-128A17.1
SFR1
C19orf77
RP11-404F10.2
CYSTM1
NBPF16
PLCL1
RUNX1
C1orf53
SIDT1
LRRC36
RP11-709D24.5
C10orf40
IPO4
CAV2
S100A3
SERPINB5
SLC9A7
FGR
CDKN2B-AS1
CAPN13
RP11-79H23.3
METTL2A
FAM227B
CDR2
SMARCA5
FAM13B
SLC35B4
C16orf80
PHRF1
QPCT
CTD-2012J19.3
RN7SL55P
PSD4
RP11-403P17.3
SLC38A7
RNA5SP450
CTC-241N9.1
FHOD1
ZRSR2
BTK
OR51E1
ARHGAP31
HSBP1L1
PEMT
LNPEP
PDE6A
RP11-830F9.6
ZNF337
PTK6
CTD-3064H18.1
POLA2
FKSG63
C10orf25
METTL13
RP11-383C5.4
QRICH1
RP11-390P2.4
ZNF709
BHLHE40-AS1
CTD-2319I12.4
OSR2
PHAX
LPAR4
PAMR1
CXorf36
MTHFD1
CHCHD4
ATRIP
CCDC132
ZSWIM3
FH
SCO2
PIGS
SH3RF3
S100A2
GLIS3
DDC
PPP1R27
RP11-838N2.4
PALM
IKZF3
RP11-875O11.1
MYL9
CTD-2369P2.8
MUC19
FBXL18
PHF10
RP11-70C1.1
RCN3
RP11-549B18.1
COPG1
PRR5L
B9D1
PLRG1
PACS1
SLC1A1
LINC00562
SH2D4A
CHGB
CTD-2132N18.4
PAEP
CIDEB
IL1R2
RHOG
MAP3K7CL
LINC00520
ASMTL-AS1
GULP1
IGHV1-69
NEK8
ATP8A1
SLC13A3
ZNF623
PLA1A
COPB2
SETMAR
HAND2-AS1
RP11-640N11.2
GIGYF1
RP11-422P24.11
GGT7
RP11-390F4.6
RP11-809N8.4
PYY
ZNF536
SH3BP2
DDX17
SAMD8
CYTH1
RP1-257A7.5
AK5
PGF
PLD4
E2F6
SNAI1
SLC9A3R2
RTN3
DKK3
PLEC
SLC25A5-AS1
SCHIP1
GOLGA6L4
LINC00847
CCNE2
KANK3
DDX60
IGHV6-1
CBFA2T2
AKNAD1
SLC25A20
PYCRL
PHTF2
MAP3K13
GCLM
SLC9A2
ARHGEF33
CCDC173
GINS3
ATP6AP1L
SGTA
CRNKL1
HS2ST1
RP11-204L24.2
FBXO10
RP4-665J23.1
HOTAIRM1
RP5-1092A3.4
LOH12CR2
OSBPL11
KLHL6
PDE4DIP
NPDC1
PCSK1N
AC003102.3
FKBPL
MCU
KLK15
RP4-816N1.6
SLC2A1
C2
PPP3CB
MSL1
PSG2
GARNL3
ISLR
ZNF577
POMGNT1
SARDH
INTS4
CHD1L
RP11-693J15.5
NEK6
CAB39L
ZNF521
ARL17B
PIK3R3
RWDD3
CD109
PTGR2
RP11-75C9.1
GGCX
SH3TC1
RP11-265N6.1
CTD-2201E18.5
KAL1
LINC00680
SLC35D1
HPS4
ABHD15
CWC25
CAND1
CPLX1
GRHL2
MDM1
NREP
RPUSD2
RP11-427H3.3
ISPD
RHOBTB2
SLC29A1
SIRPA
BOLA1
SGCD
DDX25
SH3GLB1
PARP4
GPR124
ERAP2
ETV2
C1orf115
SEMA5A
FMN2
FIBIN
RSPH3
RPP14
SEMA4B
DLL4
FAM199X
ZNF566
LINC00312
LSMEM1
ZNF524
SRCIN1
KIF27
MIR143HG
RP11-229P13.25
KIAA0753
ESR1
LIN52
CDK7
PLCXD1
RP11-81H14.2
MFI2
CNST
CTD-3110H11.1
ABHD12
RALGDS
RP11-119B16.2
AC007365.3
CMBL
LA16c-385E7.1
PYCR1
PXDC1
ERLIN2
MDK
RP11-194N12.2
PHF6
KLHDC2
FSTL3
RP11-264F23.3
SH2D7
FCRL1
FAM115C
RP11-455F5.4
ASF1A
PDGFRL
NUP153
KCNK6
LINC01006
GDAP1
CBWD7
IFT81
C1orf50
C6orf62
AKR1C2
SAMD11
RN7SL737P
CTD-2001C12.1
RP11-465B22.8
FBLN1
GFPT2
CNTNAP2
NPTX2
ABT1
ITIH4
CTD-2017C7.1
RP4-657D16.3
SCLY
SH3BGRL2
RP11-421E14.2
FBXO44
DDX28
KIAA1551
CTD-2540B15.9
PSMD3
NUDT11
AC131056.3
CTD-2199O4.1
PRICKLE3
MAVS
BPHL
RP11-69E11.4
AP5S1
PHF3
LINC00337
LEFTY1
ZNF57
RP11-178L8.7
RP11-89C3.4
LINC00426
NOC2L
CR1
LDB2
PKN3
RP11-318M2.2
C7
CRY2
RP11-1C1.7
SNRPN
GABRA2
CTC-338M12.5
FAM193B
EPOR
CSF1
IMMP1L
DOCK10
GYG1
ODF3B
PLD1
PTCRA
ATP8B2
RP11-66B24.4
ITGA2B
RP11-47A8.5
RP3-473L9.4
KIF3B
2022-09-14
AKR1B10
POLR3B
CYP3A43
CPNE2
PRR7
SH3BP1
FLYWCH1
HELLS
RNY1
ITIH5
RP11-789C17.1
LRRC1
BEND3
AP001619.2
BCL2L13
RP11-325N19.3
RAB6A
GLRA1
MPPE1
MAP3K6
BDNF-AS
PHKA2
AP4B1-AS1
SLC7A6
RP11-567M16.1
AC008746.12
PGBD1
CHRNE
RP11-768F21.1
RSPO3
RP11-385D13.3
PHPT1
SCAPER
LINC00926
ST7
MTRNR2L4
FAM66C
PTPRK
AC004447.2
C21orf119
CIZ1
RP11-469M7.1
ZNF703
SARNP
RP11-345P4.9
C16orf98
COX18
SGIP1
PCSK2
CTB-47B11.3
RP11-710F7.3
GFM1
CLEC4E
IGKV2D-28
PLCG2
GALNT11
INSIG2
KCTD12
SMPDL3B
GPR125
ZNF785
LINC00960
DIXDC1
IGDCC3
CTD-2571L23.8
POLI
RP11-77P16.4
SLC43A3
PET117
MIR145
SERPINF2
HRASLS2
CXADR
RP11-573N10.1
RP11-367G6.3
DACT3
DDX47
KCNA5
RP11-298I3.4
RP11-219G17.4
PTPRH
COQ6
SELE
ATP5EP2
CWC15
MED9
DNAJC9-AS1
FAM214B
CWF19L1
AVL9
DDX56
IRF2BPL
CTD-3222D19.5
SH3BGR
RP11-196G18.24
RP11-186N15.3
CTC-378H22.1
CEND1
CTB-5E10.3
RP11-138I1.4
ATP6V1H
FAM26E
RNU2-6P
RP11-392P7.6
RP11-81A22.5
ZNF395
RP1-23E21.2
SDC2
ANKS3
C15orf61
CTB-178M22.2
RAB26
AC016683.6
AC109828.1
GAL3ST4
RP11-453F18-B.1
CDKAL1
RP5-1091N2.9
GPR108
ARL16
CCNL1
LENG8
ALCAM
GPHN
SRD5A1
LRRC27
SLC25A21-AS1
NTN4
PRDM15
MRGBP
LINC00996
FAM32A
PARP14
DIO3
CRAMP1L
C16orf52
RP11-390B4.5
RP5-827C21.4
FAM229B
GLTSCR1L
CXCR3
FAM122C
DKK1
CCDC117
PHF13
RP11-250B2.6
KB-1836B5.1
RN7SL775P
CHI3L1
RP11-7O14.1
MAP3K3
BOLA3
C9orf169
NEU3
RP11-795F19.5
SLC23A2
CTC-332L22.1
MTRNR2L9
RP11-295D4.1
ZNF761
AC097724.3
C12orf29
CDKN2C
KDM4C
FBXO25
C6orf211
PRCC
SH3BP5
FAM167B
DDX31
LEP
RARG
PGLYRP2
ERCC8
MT1E
LDHC
IGLV3-27
PRKAR2A-AS1
ILK
RP11-166B2.5
FAM47E
ANKRD13C
RP11-713P17.3
SH3RF2
KCND3
DEF8
LINC00106
ALDH18A1
DENND2C
ASNSD1
ALG3
CHRM3
DISP1
RP3-465N24.6
GPD1L
GREB1
PCNX
PDP1
RABL6
RGS14
GDPGP1
APOBEC3A
CTD-2287O16.5
CCDC13
SLC12A6
SMAD2
RP11-91K11.2
C16orf45
GLG1
PTGIR
GALM
SGSM1
SORBS2
APLP2
GRM3
RP11-319G6.1
SLC22A4
KIAA0825
PRSS21
CTD-2325P2.4
SNORA7
SIRT1
CREBZF
PRIMPOL
CAB39
C4orf36
INTS2
EXOC3L2
FXYD6
GPR19
CKMT1B
PRIM1
PHF21A
SCARA5
ZNF718
B3GNT8
METRN
RHBDF2
IGKV3-7
KIF15
LRP2BP
LHX6
RNU6-1016P
RCL1
RP11-727F15.11
GFOD1
HNF1A-AS1
FBXL14
HCAR3
HECW1
PRIM2
LRP6
LETM2
RP11-105N14.1
RP1-102H19.8
ZNF768
LPIN1
IL11RA
KIF26B
GPR162
CTD-2325M2.1
KCTD10
FAM210B
SCN9A
HK2
RP11-126K1.2
HIST1H3C
RP11-323J4.1
RP11-196O16.1
LHCGR
RAB36
BHMT2
RP11-243A14.1
DLG4
MTRNR2L12
SHISA3
SIMC1
GPC2
HERC5
ZNF548
PPM1M
RP11-130F10.1
KSR1
C1orf95
LNP1
FKBP1B
MTRNR2L10
CTD-2547H18.1
C21orf62
AC131025.8
SH3D21
PURB
MDFIC
GEM
PHF11
NEURL2
IGKV1D-13
MURC
RAB3C
HOXA7
AC025335.1
RAB34
ZNF416
RNA5SP452
CTD-2196E14.4
FAM198B
BCR
URGCP
PDE11A
RP11-1060J15.4
DIRAS3
PLEKHA8
PCYT1A
CSF2RA
PHLDB3
KPNA3
PCNT
CAPN8
ZNF667-AS1
HIST1H3D
BRCA1
DARC
MAST2
NOP2
AC007386.2
SLC25A34
DNAJC17
SLC43A2
CASD1
ASGR1
CTC-365E16.1
FAP
PDE2A
MPP3
MOB2
RP11-505K9.1
RNF8
BNC2
PI15
PRRG2
RP11-26J3.1
IGKV1-17
ZNF692
ERRFI1
RP13-188A5.1
RP11-55K13.1
DNAJB5
FYCO1
RP11-468E2.4
RPS6KA3
FBXL7
PYGO1
GLMN
RNF112
MSS51
RBBP8NL
CCDC141
RP11-981G7.1
ARMCX4
ANGPT2
PAPD4
LINC00863
MEP1A
CTD-2562J15.6
PAQR4
RP11-513M16.8
PLA2R1
OXCT2
RP11-513I15.6
LRP3
LMBRD2
RP3-400N23.6
MARVELD1
WDFY4
KIAA1598
FNIP2
OAZ2
TPP1
C14orf2
MARCKSL1
VMO1
BRI3
CLEC2B
RAB11FIP1
ASAP1
ATP6V0D1
VDAC2
PLCD1
COX7B
CLNK
CDC42
MINOS1
CBX6
BAZ1A
ACTR2
TMED3
REPIN1
SOD2
SUPT4H1
TAPBP
WARS
BCL2A1
FAM110A
LYRM4
LINC00493
COX17
MGST2
NDUFB5
VOPP1
ATOX1
ELOVL5
PNRC1
HMGN3
EIF1B
CLIC2
SELPLG
C1orf86
ARL6IP5
C1orf21
GNA15
PTGES2
TIMM8B
USMG5
PIM3
CALR
MAT2A
RILPL2
PTP4A2
CLEC4A
AP1S2
TNFSF13B
LDHA
CSTA
BASP1
CD86
RP11-1143G9.4
CARD16
YWHAE
RAB31
TSPO
TBCA
SYNGR2
CAPZA2
MYO1F
RBPJ
CLEC7A
SMCO4
PTRHD1
PHACTR3
YKT6
XYLT1
ASB11
RTCB
DLC1
BTN3A1
PHB
LINC00618
KLKB1
ATRX
CTD-2576D5.4
RAB5B
AP001626.2
SPESP1
COMMD5
LINC00608
POLR3K
SNCA
CTD-2270L9.4
POPDC3
BTN2A1
FUT4
PCOLCE-AS1
MTPAP
RP11-24B19.4
KIAA1429
SDK1
MATN3
GEMIN4
DISP2
FUK
DHFR
RP11-191L17.1
MRP63
BCOR
[truncated: 1,761 more rows]
