# Supplementary material for: Adipose-derived mesenchymal stem cells may reduce intestinal epithelial damage in ulcerative colitis by communicating with macrophages and blocking inflammatory pathways: an analysis in silico
Source: Aging (Albany NY). 2022 Mar 22;14(6):2665–77. doi: 10.18632/aging.203964 (PMC9004563; doi:10.18632/aging.203964)
Supplement: Supplementary Table 4 [file aging-14-203964-s003.xlsx]

## Sheet: Net_Best4+ Enterocytes
Supplementary Table 4. The interactions among the enriched pathways and the differentially expressed genes in Best4+ enterocytes.
Node1	Node2
PI3K-Akt signaling pathway	PPP2R5C
PI3K-Akt signaling pathway	PPP2CB
PI3K-Akt signaling pathway	CDC37
PI3K-Akt signaling pathway	PPP2R5A
PI3K-Akt signaling pathway	LAMA2
PI3K-Akt signaling pathway	PPP2R2A
PI3K-Akt signaling pathway	PIK3CB
PI3K-Akt signaling pathway	PPP2R1A
Autophagy - animal	PIK3CD
PI3K-Akt signaling pathway	DDIT4
Autophagy - animal	PIK3R1
PI3K-Akt signaling pathway	ERBB3
Autophagy - animal	PIK3R2
PI3K-Akt signaling pathway	IL2RG
PI3K-Akt signaling pathway	PPP2R2D
PI3K-Akt signaling pathway	PIK3R3
PI3K-Akt signaling pathway	SGK2
PI3K-Akt signaling pathway	PIK3CG
HIF-1 signaling pathway	PIK3CB
PI3K-Akt signaling pathway	ANGPT1
Autophagy - animal	PIK3R4
Apoptosis	CTSZ
Apoptosis	BIRC3
Autophagy - animal	IRS2
Apoptosis	PARP2
Apoptosis	GADD45G
HIF-1 signaling pathway	ANGPT1
Autophagy - animal	CFLAR
JAK-STAT signaling pathway	PIK3R1
Apoptosis	DAB2IP
Apoptosis	BCL2
Apoptosis	CFLAR
Apoptosis	IKBKB
Apoptosis	GADD45A
Autophagy - animal	PPP2CB
Autophagy - animal	MTMR3
PI3K-Akt signaling pathway	EPOR
PI3K-Akt signaling pathway	LPAR4
PI3K-Akt signaling pathway	IKBKB
Apoptosis	GADD45B
HIF-1 signaling pathway	PGK1
HIF-1 signaling pathway	PDHB
PI3K-Akt signaling pathway	PIK3R2
Apoptosis	PIK3R2
HIF-1 signaling pathway	PIK3R3
PI3K-Akt signaling pathway	PPP2R3A
Autophagy - animal	PIK3CB
Apoptosis	PIK3CA
Apoptosis	KRAS
Autophagy - animal	DDIT4
Autophagy - animal	BCL2
PI3K-Akt signaling pathway	RPS6KB2
PI3K-Akt signaling pathway	KRAS
HIF-1 signaling pathway	PIK3CA
HIF-1 signaling pathway	RPS6KB2
HIF-1 signaling pathway	ALDOB
HIF-1 signaling pathway	NOS2
PI3K-Akt signaling pathway	PIK3R1
PI3K-Akt signaling pathway	PIK3CD
PI3K-Akt signaling pathway	JAK1
Apoptosis	PIK3R3
Autophagy - animal	RPS6KB2
Autophagy - animal	KRAS
Apoptosis	PIK3CB
Apoptosis	LMNA
Autophagy - animal	PIK3R3
PI3K-Akt signaling pathway	ITGAV
PI3K-Akt signaling pathway	GNG12
JAK-STAT signaling pathway	PIK3R2
HIF-1 signaling pathway	IGF1R
HIF-1 signaling pathway	MTOR
PI3K-Akt signaling pathway	GNG11
PI3K-Akt signaling pathway	PIK3CA
JAK-STAT signaling pathway	PIK3CD
PI3K-Akt signaling pathway	LPAR3
Autophagy - animal	MTMR4
PI3K-Akt signaling pathway	BRCA1
PI3K-Akt signaling pathway	RAC1
JAK-STAT signaling pathway	IL10RA
PI3K-Akt signaling pathway	ITGB1
PI3K-Akt signaling pathway	GNB5
PI3K-Akt signaling pathway	MTOR
PI3K-Akt signaling pathway	FGFR4
JAK-STAT signaling pathway	CNTFR
JAK-STAT signaling pathway	IL11RA
PI3K-Akt signaling pathway	IGF1R
PI3K-Akt signaling pathway	PIK3AP1
JAK-STAT signaling pathway	PIK3R3
JAK-STAT signaling pathway	PIK3CB
Autophagy - animal	PIK3CA
JAK-STAT signaling pathway	BCL2
JAK-STAT signaling pathway	MTOR
Autophagy - animal	BNIP3
JAK-STAT signaling pathway	EPOR
PI3K-Akt signaling pathway	ITGA2B
PI3K-Akt signaling pathway	PIK3R5
JAK-STAT signaling pathway	IL2RG
JAK-STAT signaling pathway	IL21R
HIF-1 signaling pathway	PFKP
HIF-1 signaling pathway	BCL2
PI3K-Akt signaling pathway	ITGB6
JAK-STAT signaling pathway	JAK1
Autophagy - animal	PIK3C3
Autophagy - animal	IGF1R
Autophagy - animal	MTOR
Apoptosis	PIK3CD
Apoptosis	PIK3R1
JAK-STAT signaling pathway	PIK3CA
JAK-STAT signaling pathway	LIFR
PI3K-Akt signaling pathway	BCL2
PI3K-Akt signaling pathway	CRTC2
JAK-STAT signaling pathway	IL12RB2
HIF-1 signaling pathway	PIK3CD
HIF-1 signaling pathway	PIK3R1
HIF-1 signaling pathway	PIK3R2
ALDOB	PFKP
ALDOB	PGK1
ALDOB	PDHB
ANGPT1	PIK3R1
ANGPT1	PIK3CA
ANGPT1	FGFR4
ANGPT1	KRAS
ANGPT1	PIK3CB
ANGPT1	PIK3R2
ANGPT1	IGF1R
ANGPT1	ITGB1
ANGPT1	ERBB3
BCL2	PPP2R5A
BCL2	PPP2CB
BCL2	PPP2R3A
BCL2	PPP2R5C
BCL2	PPP2R2A
BCL2	BNIP3
BCL2	ITGA2B
BCL2	IL2RG
BCL2	PPP2R1A
BCL2	JAK1
BCL2	CTSZ
BCL2	PPP2R2D
BIRC3	CTSZ
BIRC3	IKBKB
BIRC3	CFLAR
BNIP3	PGK1
BNIP3	MTOR
BNIP3	DDIT4
BNIP3	PIK3C3
BRCA1	GADD45A
BRCA1	PIK3R1
BRCA1	PARP2
BRCA1	KRAS
BRCA1	PIK3CA
BRCA1	LMNA
CDC37	KRAS
CDC37	PIK3CA
CDC37	IKBKB
CDC37	PIK3R1
CFLAR	IKBKB
CNTFR	JAK1
CNTFR	LIFR
CRTC2	MTOR
DAB2IP	KRAS
DDIT4	MTOR
EPOR	PIK3R1
EPOR	IRS2
EPOR	JAK1
ERBB3	PIK3R3
ERBB3	PIK3CB
ERBB3	MTOR
ERBB3	PIK3R1
ERBB3	PIK3CA
ERBB3	KRAS
ERBB3	PIK3CD
ERBB3	JAK1
ERBB3	PIK3R2
FGFR4	PIK3CA
FGFR4	PIK3CD
FGFR4	PIK3R3
FGFR4	KRAS
FGFR4	PIK3R2
FGFR4	PIK3R1
FGFR4	PIK3CB
FGFR4	PIK3AP1
GADD45A	GADD45G
GADD45A	GADD45B
GADD45B	GADD45G
GNB5	PIK3R3
GNB5	PIK3R2
GNB5	PIK3R1
GNB5	KRAS
GNB5	PIK3CB
GNB5	LPAR4
GNB5	GNG12
GNB5	PIK3CG
GNB5	GNG11
GNB5	PIK3CA
GNB5	PIK3CD
GNB5	PIK3R5
GNB5	LPAR3
GNG11	PIK3R2
GNG11	KRAS
GNG11	PIK3CB
GNG11	PIK3CA
GNG11	PIK3CD
GNG11	PIK3R1
GNG11	LPAR3
GNG11	GNG12
GNG11	PIK3CG
GNG11	LPAR4
GNG11	PIK3R3
GNG11	PIK3R5
GNG12	PIK3CB
GNG12	LPAR4
GNG12	LPAR3
GNG12	PIK3R3
GNG12	KRAS
GNG12	PIK3CA
GNG12	PIK3R1
GNG12	PIK3CD
GNG12	PIK3R2
GNG12	PIK3R5
GNG12	PIK3CG
IGF1R	PIK3CD
IGF1R	MTOR
IGF1R	PIK3R3
IGF1R	PIK3CA
IGF1R	PIK3R2
IGF1R	IRS2
IGF1R	KRAS
IGF1R	PIK3CB
IGF1R	PIK3CG
IGF1R	JAK1
IGF1R	PIK3R1
IGF1R	ITGAV
IGF1R	ITGB1
IKBKB	MTOR
IKBKB	IRS2
IL10RA	JAK1
IL10RA	IL2RG
IL11RA	JAK1
IL12RB2	NOS2
IL12RB2	JAK1
IL21R	JAK1
IL21R	IL2RG
IL2RG	PIK3CA
IL2RG	PIK3R3
IL2RG	PIK3CB
IL2RG	JAK1
IL2RG	PIK3CD
IL2RG	KRAS
IL2RG	PIK3R1
IL2RG	PIK3R2
IL2RG	ITGA2B
IL2RG	IRS2
IRS2	PIK3R5
IRS2	PIK3R1
IRS2	PIK3CA
IRS2	PIK3CD
IRS2	MTOR
IRS2	JAK1
IRS2	KRAS
IRS2	PIK3R2
IRS2	PIK3CB
IRS2	PIK3CG
IRS2	PIK3R3
ITGA2B	KRAS
ITGA2B	PIK3CA
ITGA2B	LAMA2
ITGA2B	PIK3R1
ITGA2B	ITGB1
ITGA2B	LMNA
ITGA2B	ITGB6
ITGA2B	JAK1
ITGA2B	ITGAV
ITGAV	PIK3CA
ITGAV	ITGB1
ITGAV	PIK3R1
ITGAV	LAMA2
ITGAV	RAC1
ITGAV	ITGB6
ITGB1	RAC1
ITGB1	PIK3R1
ITGB1	PIK3CD
ITGB1	PIK3R3
ITGB1	PIK3CB
ITGB1	PIK3CA
ITGB1	LAMA2
ITGB1	PIK3R2
ITGB1	ITGB6
ITGB6	LAMA2
JAK1	PIK3CA
JAK1	PIK3CD
JAK1	KRAS
JAK1	PIK3R3
JAK1	PIK3R2
JAK1	PIK3R1
JAK1	PIK3CB
JAK1	LIFR
KRAS	PIK3R1
KRAS	PIK3CA
KRAS	PPP2R5A
KRAS	PIK3R3
KRAS	MTOR
KRAS	PPP2R5C
KRAS	LMNA
KRAS	PIK3CD
KRAS	PIK3R2
KRAS	PPP2CB
KRAS	RAC1
KRAS	PIK3CB
KRAS	PPP2R1A
KRAS	PIK3CG
LAMA2	RAC1
LIFR	PIK3CD
LIFR	PIK3CB
LIFR	PIK3R3
LIFR	PIK3CA
LIFR	PIK3R1
LIFR	PIK3R2
LPAR3	PIK3CB
LPAR3	PIK3R2
LPAR3	PIK3CG
LPAR3	PIK3R1
LPAR3	PIK3R5
LPAR3	LPAR4
LPAR3	PIK3CA
LPAR3	PIK3R3
LPAR4	PIK3CA
LPAR4	PIK3R2
LPAR4	PIK3R3
LPAR4	PIK3CG
LPAR4	PIK3R5
LPAR4	PIK3R1
MTMR3	PIK3R1
MTMR3	PIK3R3
MTMR3	PIK3R2
MTMR3	PIK3C3
MTMR3	MTMR4
MTMR4	PIK3R2
MTMR4	PIK3R3
MTMR4	PIK3R1
MTMR4	PIK3C3
MTOR	PIK3R2
MTOR	PIK3CA
MTOR	PIK3R1
MTOR	PIK3CD
MTOR	PPP2R2A
MTOR	PIK3CB
MTOR	RPS6KB2
MTOR	PIK3R3
MTOR	PIK3R4
MTOR	SGK2
MTOR	PIK3CG
PDHB	PGK1
PDHB	PFKP
PFKP	PGK1
PIK3AP1	PIK3R2
PIK3AP1	PIK3CA
PIK3AP1	PIK3R1
PIK3AP1	PIK3R3
PIK3AP1	PIK3CD
PIK3AP1	PIK3CB
PIK3C3	PIK3CD
PIK3C3	PIK3CB
PIK3C3	PIK3R1
PIK3C3	PIK3R2
PIK3C3	PIK3CA
PIK3C3	PIK3R4
PIK3C3	PIK3R3
PIK3C3	PIK3R5
PIK3C3	PIK3CG
PIK3CA	PIK3R2
PIK3CA	PPP2R1A
PIK3CA	PIK3R1
PIK3CA	PIK3R3
PIK3CA	RPS6KB2
PIK3CA	SGK2
PIK3CA	PIK3CB
PIK3CA	PIK3R5
PIK3CA	RAC1
PIK3CA	PIK3CD
PIK3CA	PIK3CG
PIK3CA	PIK3R4
PIK3CB	PIK3CD
PIK3CB	PIK3R3
PIK3CB	PIK3R2
PIK3CB	PIK3R1
PIK3CB	PIK3R5
PIK3CB	PIK3CG
PIK3CB	PIK3R4
PIK3CB	RAC1
PIK3CD	PIK3R1
PIK3CD	PIK3R3
PIK3CD	PIK3R2
PIK3CD	RAC1
PIK3CD	PIK3R5
PIK3CD	PIK3CG
PIK3CD	PIK3R4
PIK3CG	PIK3R1
PIK3CG	PIK3R5
PIK3CG	PIK3R2
PIK3CG	PIK3R3
PIK3CG	PIK3R4
PIK3R1	PIK3R5
PIK3R1	RAC1
PIK3R1	PIK3R2
PIK3R1	PIK3R3
PIK3R1	PIK3R4
PIK3R2	PIK3R3
PIK3R2	PIK3R5
PIK3R2	RAC1
PIK3R2	PIK3R4
PIK3R3	PIK3R4
PIK3R3	PIK3R5
PIK3R3	RAC1
PIK3R4	PIK3R5
PPP2CB	PPP2R1A
PPP2CB	PPP2R5A
PPP2CB	PPP2R2D
PPP2CB	PPP2R2A
PPP2CB	RPS6KB2
PPP2CB	PPP2R3A
PPP2CB	PPP2R5C
PPP2R1A	PPP2R5A
PPP2R1A	RPS6KB2
PPP2R1A	PPP2R3A
PPP2R1A	PPP2R2A
PPP2R1A	PPP2R2D
PPP2R1A	PPP2R5C
PPP2R2A	PPP2R3A
PPP2R2A	PPP2R5A
PPP2R2A	PPP2R5C
PPP2R2A	PPP2R2D
PPP2R2D	PPP2R5C
PPP2R2D	PPP2R5A
PPP2R2D	PPP2R3A
PPP2R3A	PPP2R5C
PPP2R3A	PPP2R5A
PPP2R5A	PPP2R5C
