# Supplementary material for: Adipose-derived mesenchymal stem cells may reduce intestinal epithelial damage in ulcerative colitis by communicating with macrophages and blocking inflammatory pathways: an analysis in silico
Source: Aging (Albany NY). 2022 Mar 22;14(6):2665–77. doi: 10.18632/aging.203964 (PMC9004563; doi:10.18632/aging.203964)
Supplement: Supplementary Table 5 [file aging-14-203964-s004.xlsx]

## Sheet: Net_Enterocytes
Supplementary Table 5. The interactions among the enriched pathways and the differentially expressed genes in enterocytes.
Node1	Node2
Autophagy - animal	CFLAR
Autophagy - animal	KRAS
Autophagy - animal	MTMR14
Autophagy - animal	PIK3R1
PI3K-Akt signaling pathway	PPP2R5C
PI3K-Akt signaling pathway	BRCA1
PI3K-Akt signaling pathway	CDK2
PI3K-Akt signaling pathway	LPAR2
PI3K-Akt signaling pathway	CSF1
PI3K-Akt signaling pathway	CCND2
PI3K-Akt signaling pathway	ANGPT1
PI3K-Akt signaling pathway	PIK3AP1
PI3K-Akt signaling pathway	PPP2R1A
PI3K-Akt signaling pathway	IGF1R
Autophagy - animal	PIK3CA
Autophagy - animal	RRAGB
Autophagy - animal	BECN1
Autophagy - animal	PIK3CB
Autophagy - animal	MTOR
Autophagy - animal	PIK3R4
Autophagy - animal	MTMR4
Autophagy - animal	PIK3C3
Autophagy - animal	CTSD
Autophagy - animal	IRS2
Autophagy - animal	PRKACA
Autophagy - animal	RPS6KB2
Autophagy - animal	IGF1R
Autophagy - animal	AKT1S1
PI3K-Akt signaling pathway	NOS3
PI3K-Akt signaling pathway	ITGA2
PI3K-Akt signaling pathway	RPS6KB2
PI3K-Akt signaling pathway	IGF1
PI3K-Akt signaling pathway	PPP2R1B
HIF-1 signaling pathway	LDHC
HIF-1 signaling pathway	PIK3R1
HIF-1 signaling pathway	PIK3CA
HIF-1 signaling pathway	PDHB
HIF-1 signaling pathway	PIK3CB
HIF-1 signaling pathway	MTOR
HIF-1 signaling pathway	PFKP
HIF-1 signaling pathway	SLC2A1
HIF-1 signaling pathway	ANGPT2
HIF-1 signaling pathway	NOS3
HIF-1 signaling pathway	RPS6KB2
HIF-1 signaling pathway	IGF1
HIF-1 signaling pathway	ANGPT1
HIF-1 signaling pathway	IGF1R
PI3K-Akt signaling pathway	LPAR3
PI3K-Akt signaling pathway	EREG
PI3K-Akt signaling pathway	PIK3CG
PI3K-Akt signaling pathway	ERBB3
PI3K-Akt signaling pathway	KRAS
PI3K-Akt signaling pathway	ITGA2B
PI3K-Akt signaling pathway	IKBKB
PI3K-Akt signaling pathway	ITGAV
PI3K-Akt signaling pathway	CRTC2
PI3K-Akt signaling pathway	GNGT2
PI3K-Akt signaling pathway	SGK2
PI3K-Akt signaling pathway	PIK3R1
PI3K-Akt signaling pathway	PPP2R5A
PI3K-Akt signaling pathway	PIK3CA
PI3K-Akt signaling pathway	CDC37
PI3K-Akt signaling pathway	F2R
PI3K-Akt signaling pathway	PIK3CB
PI3K-Akt signaling pathway	ITGB1
PI3K-Akt signaling pathway	MTOR
PI3K-Akt signaling pathway	SGK3
PI3K-Akt signaling pathway	EPOR
PI3K-Akt signaling pathway	GNG11
PI3K-Akt signaling pathway	FGFR4
PI3K-Akt signaling pathway	LPAR4
PI3K-Akt signaling pathway	GNG12
PI3K-Akt signaling pathway	PPP2R2A
PI3K-Akt signaling pathway	LPAR5
PI3K-Akt signaling pathway	ANGPT2
PI3K-Akt signaling pathway	LAMB1
PI3K-Akt signaling pathway	PPP2R5D
PI3K-Akt signaling pathway	LAMA2
PI3K-Akt signaling pathway	IL2RG
PI3K-Akt signaling pathway	PIK3R5
PI3K-Akt signaling pathway	PDGFA
PI3K-Akt signaling pathway	PPP2R5B
PI3K-Akt signaling pathway	FLT3LG
AKT1S1	RPS6KB2
AKT1S1	MTOR
AKT1S1	PIK3C3
AKT1S1	PRKACA
AKT1S1	PIK3CA
AKT1S1	RRAGB
ANGPT1	ANGPT2
ANGPT1	PIK3CB
ANGPT1	IGF1R
ANGPT1	PIK3CA
ANGPT1	FGFR4
ANGPT1	PIK3R1
ANGPT1	NOS3
ANGPT1	IGF1
ANGPT1	KRAS
ANGPT1	ERBB3
ANGPT1	ITGB1
ANGPT2	PIK3CA
ANGPT2	PIK3R1
ANGPT2	ERBB3
ANGPT2	IGF1R
ANGPT2	FGFR4
ANGPT2	NOS3
BECN1	MTOR
BECN1	PIK3CG
BECN1	BRCA1
BECN1	PIK3R1
BECN1	CTSD
BECN1	PIK3CB
BECN1	PIK3R4
BECN1	PIK3C3
BECN1	PIK3CA
BECN1	PIK3R5
BRCA1	KRAS
BRCA1	PIK3R1
BRCA1	PIK3CA
BRCA1	CDK2
CCND2	PIK3CA
CCND2	KRAS
CCND2	MTOR
CCND2	IRS2
CCND2	CDK2
CCND2	IGF1
CDC37	KRAS
CDC37	CDK2
CDC37	PIK3R1
CDC37	PIK3CA
CDC37	EREG
CDC37	IKBKB
CDK2	MTOR
CDK2	KRAS
CFLAR	IKBKB
CFLAR	IGF1
CRTC2	MTOR
CSF1	ERBB3
CSF1	IGF1
CSF1	IGF1R
CSF1	FLT3LG
CSF1	ITGAV
CSF1	LAMB1
CSF1	FGFR4
CTSD	PIK3C3
EPOR	IRS2
EPOR	PIK3R1
EPOR	PDGFA
ERBB3	EREG
ERBB3	PIK3CB
ERBB3	LAMB1
ERBB3	IGF1
ERBB3	MTOR
ERBB3	PDGFA
ERBB3	KRAS
ERBB3	PIK3R1
ERBB3	PRKACA
ERBB3	PIK3CA
ERBB3	FLT3LG
EREG	FGFR4
EREG	IGF1R
EREG	PIK3R1
EREG	PIK3CA
EREG	KRAS
F2R	GNG11
F2R	LPAR2
F2R	PIK3CA
F2R	PIK3R5
F2R	GNG12
F2R	LPAR4
F2R	GNGT2
F2R	PIK3R1
F2R	PIK3CG
F2R	LPAR3
F2R	LPAR5
F2R	ITGA2B
FGFR4	PDGFA
FGFR4	PIK3CA
FGFR4	IGF1
FGFR4	PIK3R1
FGFR4	PIK3CB
FGFR4	PIK3AP1
FGFR4	KRAS
FGFR4	FLT3LG
FLT3LG	IGF1R
FLT3LG	PIK3R1
FLT3LG	KRAS
GNG11	LPAR2
GNG11	PIK3CG
GNG11	PIK3CB
GNG11	GNGT2
GNG11	PIK3CA
GNG11	PIK3R5
GNG11	PRKACA
GNG11	LPAR3
GNG11	LPAR5
GNG11	PIK3R1
GNG11	GNG12
GNG11	KRAS
GNG11	LPAR4
GNG12	GNGT2
GNG12	PIK3R5
GNG12	PIK3CB
GNG12	KRAS
GNG12	PRKACA
GNG12	LPAR4
GNG12	LPAR5
GNG12	LPAR3
GNG12	PIK3R1
GNG12	PIK3CA
GNG12	PIK3CG
GNG12	LPAR2
GNGT2	LPAR5
GNGT2	PIK3R1
GNGT2	PRKACA
GNGT2	PIK3CB
GNGT2	KRAS
GNGT2	LPAR4
GNGT2	PIK3R5
GNGT2	PIK3CA
GNGT2	LPAR3
GNGT2	LPAR2
GNGT2	PIK3CG
IGF1	ITGAV
IGF1	SLC2A1
IGF1	PIK3R1
IGF1	PDGFA
IGF1	PIK3CA
IGF1	IGF1R
IGF1	NOS3
IGF1	IRS2
IGF1	KRAS
IGF1	MTOR
IGF1R	PIK3R1
IGF1R	ITGB1
IGF1R	MTOR
IGF1R	PIK3CB
IGF1R	PDGFA
IGF1R	PIK3CG
IGF1R	PIK3CA
IGF1R	IRS2
IGF1R	KRAS
IGF1R	PRKACA
IGF1R	ITGAV
IGF1R	SLC2A1
IKBKB	MTOR
IKBKB	IRS2
IL2RG	PIK3CB
IL2RG	KRAS
IL2RG	PIK3R1
IL2RG	PDGFA
IL2RG	PIK3CA
IL2RG	IRS2
IL2RG	ITGA2B
IRS2	SLC2A1
IRS2	PIK3CB
IRS2	PIK3CA
IRS2	PIK3R1
IRS2	KRAS
IRS2	MTOR
IRS2	PIK3CG
IRS2	PIK3R5
ITGA2	PIK3R1
ITGA2	ITGAV
ITGA2	PIK3CB
ITGA2	PRKACA
ITGA2	LAMA2
ITGA2	PIK3CA
ITGA2	ITGB1
ITGA2	ITGA2B
ITGA2	LAMB1
ITGA2B	KRAS
ITGA2B	PIK3R1
ITGA2B	LAMA2
ITGA2B	ITGAV
ITGA2B	PIK3CA
ITGA2B	LAMB1
ITGA2B	ITGB1
ITGAV	PIK3CA
ITGAV	PIK3R1
ITGAV	LAMB1
ITGAV	LAMA2
ITGAV	ITGB1
ITGB1	PIK3CA
ITGB1	PRKACA
ITGB1	LAMB1
ITGB1	PIK3R1
ITGB1	PIK3CB
ITGB1	LAMA2
KRAS	PIK3CA
KRAS	SLC2A1
KRAS	PIK3R1
KRAS	PPP2R1B
KRAS	PPP2R5A
KRAS	PIK3CG
KRAS	PPP2R5B
KRAS	PPP2R5C
KRAS	MTOR
KRAS	PIK3CB
KRAS	PPP2R1A
KRAS	PPP2R5D
LAMA2	LAMB1
LAMB1	PIK3R1
LAMB1	PIK3CA
LDHC	PFKP
LDHC	PDHB
LPAR2	PIK3CA
LPAR2	PIK3R1
LPAR2	LPAR4
LPAR2	LPAR5
LPAR2	PIK3R5
LPAR2	PIK3CG
LPAR2	PIK3CB
LPAR2	LPAR3
LPAR3	LPAR5
LPAR3	PIK3CG
LPAR3	PIK3CA
LPAR3	PIK3R1
LPAR3	PIK3CB
LPAR3	LPAR4
LPAR3	PIK3R5
LPAR4	PIK3CA
LPAR4	PIK3R1
LPAR4	LPAR5
LPAR4	PIK3R5
LPAR4	PIK3CG
LPAR5	PIK3R1
LPAR5	PIK3CA
LPAR5	PIK3R5
LPAR5	PIK3CG
MTMR14	PIK3R1
MTMR14	MTMR4
MTMR14	PIK3C3
MTMR4	PIK3R1
MTMR4	PIK3C3
MTOR	PIK3CB
MTOR	PIK3CA
MTOR	SLC2A1
MTOR	RPS6KB2
MTOR	PIK3CG
MTOR	PPP2R5D
MTOR	PPP2R2A
MTOR	RRAGB
MTOR	PIK3R1
MTOR	SGK2
MTOR	PIK3R4
MTOR	SGK3
NOS3	PRKACA
PDGFA	PIK3CA
PDGFA	PIK3R1
PDHB	PFKP
PFKP	SLC2A1
PIK3AP1	PIK3CA
PIK3AP1	PIK3R1
PIK3AP1	PIK3CB
PIK3C3	PIK3R5
PIK3C3	PIK3CA
PIK3C3	PIK3R4
PIK3C3	PIK3CB
PIK3C3	PIK3R1
PIK3C3	PIK3CG
PIK3C3	RRAGB
PIK3C3	SGK3
PIK3CA	PIK3CB
PIK3CA	RPS6KB2
PIK3CA	PIK3R1
PIK3CA	PPP2R1A
PIK3CA	SGK3
PIK3CA	PIK3R5
PIK3CA	PIK3R4
PIK3CA	PIK3CG
PIK3CA	SGK2
PIK3CB	PIK3CG
PIK3CB	PIK3R1
PIK3CB	PIK3R5
PIK3CB	PIK3R4
PIK3CG	PIK3R1
PIK3CG	PIK3R4
PIK3CG	PIK3R5
PIK3R1	PIK3R5
PIK3R1	PIK3R4
PIK3R4	PIK3R5
PPP2R1A	RPS6KB2
PPP2R1A	PRKACA
PPP2R1A	PPP2R5B
PPP2R1A	PPP2R5C
PPP2R1A	PPP2R5D
PPP2R1A	PPP2R2A
PPP2R1A	PPP2R1B
PPP2R1A	PPP2R5A
PPP2R1B	RPS6KB2
PPP2R1B	PPP2R2A
PPP2R1B	PPP2R5C
PPP2R1B	PPP2R5A
PPP2R1B	PPP2R5D
PPP2R1B	PPP2R5B
PPP2R2A	PPP2R5A
PPP2R2A	PPP2R5C
PPP2R2A	PPP2R5B
PPP2R2A	PPP2R5D
PPP2R5A	PPP2R5C
PPP2R5A	PPP2R5B
PPP2R5A	PPP2R5D
PPP2R5B	PPP2R5D
PPP2R5B	PPP2R5C
PPP2R5C	PPP2R5D
PRKACA	RPS6KB2
