# Supplementary material for: Adipose-derived mesenchymal stem cells may reduce intestinal epithelial damage in ulcerative colitis by communicating with macrophages and blocking inflammatory pathways: an analysis in silico
Source: Aging (Albany NY). 2022 Mar 22;14(6):2665–77. doi: 10.18632/aging.203964 (PMC9004563; doi:10.18632/aging.203964)
Supplement: Supplementary Table 6 [file aging-14-203964-s005.xlsx]

## Sheet: Net_Immature Enterocytes 2
Supplementary Table 6. The interactions among the enriched pathways and the differentially expressed genes in immature enterocytes 2.
Node1	Node2
JAK-STAT signaling pathway	PIK3CD
JAK-STAT signaling pathway	IL22RA1
JAK-STAT signaling pathway	IL2RG
JAK-STAT signaling pathway	JAK1
JAK-STAT signaling pathway	MTOR
JAK-STAT signaling pathway	IL15
Autophagy - animal	IRS2
Apoptosis	PARP2
JAK-STAT signaling pathway	PIK3CB
Apoptosis	BAX
Apoptosis	DAB2IP
Apoptosis	CFLAR
Apoptosis	PIK3R1
Apoptosis	KRAS
Apoptosis	CTSZ
Apoptosis	CASP6
JAK-STAT signaling pathway	IL12RB2
Apoptosis	PIK3CB
JAK-STAT signaling pathway	PIK3R1
PI3K-Akt signaling pathway	PDGFA
JAK-STAT signaling pathway	IRF9
JAK-STAT signaling pathway	CNTFR
Apoptosis	PIK3R2
Apoptosis	PIK3CD
Apoptosis	GADD45B
Apoptosis	CTSD
HIF-1 signaling pathway	PIK3R1
HIF-1 signaling pathway	PDHB
HIF-1 signaling pathway	ALDOB
HIF-1 signaling pathway	IGF1R
Autophagy - animal	PPP2CA
Autophagy - animal	MTMR3
Autophagy - animal	PIK3R3
Autophagy - animal	AKT1S1
Autophagy - animal	MAP3K7
Apoptosis	PIK3CA
Apoptosis	PIK3R3
PI3K-Akt signaling pathway	PIK3R3
PI3K-Akt signaling pathway	SGK3
PI3K-Akt signaling pathway	CCND2
HIF-1 signaling pathway	PFKP
HIF-1 signaling pathway	PIK3CB
HIF-1 signaling pathway	MTOR
PI3K-Akt signaling pathway	GNB5
PI3K-Akt signaling pathway	SGK2
HIF-1 signaling pathway	PIK3CD
Autophagy - animal	CFLAR
PI3K-Akt signaling pathway	NOS3
PI3K-Akt signaling pathway	LAMA2
PI3K-Akt signaling pathway	LPAR2
Autophagy - animal	PIK3CD
Autophagy - animal	CTSD
Autophagy - animal	PIK3R2
Autophagy - animal	RPS6KB2
Autophagy - animal	PIK3CA
PI3K-Akt signaling pathway	ITGA11
PI3K-Akt signaling pathway	FGFR4
PI3K-Akt signaling pathway	GNG11
PI3K-Akt signaling pathway	PPP2R5C
PI3K-Akt signaling pathway	PPP2CB
PI3K-Akt signaling pathway	LPAR3
PI3K-Akt signaling pathway	JAK1
PI3K-Akt signaling pathway	EREG
PI3K-Akt signaling pathway	PIK3CD
PI3K-Akt signaling pathway	ITGA2
PI3K-Akt signaling pathway	PIK3R2
Autophagy - animal	MTMR4
PI3K-Akt signaling pathway	ITGB6
PI3K-Akt signaling pathway	PPP2R5D
PI3K-Akt signaling pathway	IKBKB
Autophagy - animal	MTOR
Autophagy - animal	PPP2CB
PI3K-Akt signaling pathway	PIK3CA
PI3K-Akt signaling pathway	ANGPT2
PI3K-Akt signaling pathway	IGF1R
PI3K-Akt signaling pathway	PPP2R5E
Autophagy - animal	PIK3C3
PI3K-Akt signaling pathway	MTOR
PI3K-Akt signaling pathway	PPP2R3B
PI3K-Akt signaling pathway	IL2RG
Apoptosis	PMAIP1
Apoptosis	PARP4
PI3K-Akt signaling pathway	PPP2R3C
JAK-STAT signaling pathway	PIK3R2
JAK-STAT signaling pathway	EPOR
JAK-STAT signaling pathway	LIFR
PI3K-Akt signaling pathway	PIK3CB
Apoptosis	IKBKB
PI3K-Akt signaling pathway	LAMB1
Autophagy - animal	IGF1R
HIF-1 signaling pathway	PIK3R2
PI3K-Akt signaling pathway	LPAR4
PI3K-Akt signaling pathway	PPP2CA
PI3K-Akt signaling pathway	CDC37
PI3K-Akt signaling pathway	GNG12
PI3K-Akt signaling pathway	PIK3CG
PI3K-Akt signaling pathway	PIK3AP1
Autophagy - animal	BNIP3
Autophagy - animal	KRAS
Autophagy - animal	PIK3CB
PI3K-Akt signaling pathway	RPS6KB2
PI3K-Akt signaling pathway	EPOR
PI3K-Akt signaling pathway	RAC1
PI3K-Akt signaling pathway	PPP2R1A
PI3K-Akt signaling pathway	ITGB1
JAK-STAT signaling pathway	PIK3R3
JAK-STAT signaling pathway	PDGFA
JAK-STAT signaling pathway	IL21R
JAK-STAT signaling pathway	IL10RA
Autophagy - animal	PIK3R1
HIF-1 signaling pathway	RPS6KB2
PI3K-Akt signaling pathway	CRTC2
HIF-1 signaling pathway	PIK3R3
JAK-STAT signaling pathway	PIK3CA
HIF-1 signaling pathway	PIK3CA
HIF-1 signaling pathway	ANGPT2
HIF-1 signaling pathway	PLCG2
JAK-STAT signaling pathway	CCND2
HIF-1 signaling pathway	NOS3
PI3K-Akt signaling pathway	PIK3R1
PI3K-Akt signaling pathway	ITGA2B
PI3K-Akt signaling pathway	GNGT2
PI3K-Akt signaling pathway	ITGAV
PI3K-Akt signaling pathway	ERBB3
PI3K-Akt signaling pathway	KRAS
HIF-1 signaling pathway	NOS2
PI3K-Akt signaling pathway	BRCA1
AKT1S1	RPS6KB2
AKT1S1	PIK3CA
AKT1S1	MTOR
AKT1S1	PIK3C3
ALDOB	PDHB
ALDOB	PFKP
ANGPT2	IGF1R
ANGPT2	PIK3CA
ANGPT2	PIK3R1
ANGPT2	FGFR4
ANGPT2	ERBB3
ANGPT2	NOS3
BAX	PMAIP1
BNIP3	PMAIP1
BNIP3	MTOR
BNIP3	PIK3C3
BRCA1	KRAS
BRCA1	PIK3R1
BRCA1	PIK3CA
BRCA1	PARP2
CCND2	MTOR
CCND2	PIK3CA
CCND2	KRAS
CCND2	IRS2
CDC37	KRAS
CDC37	IKBKB
CDC37	PIK3CA
CDC37	PIK3R1
CDC37	EREG
CFLAR	IKBKB
CFLAR	PMAIP1
CNTFR	LIFR
CNTFR	PDGFA
CNTFR	IL15
CNTFR	JAK1
CRTC2	MTOR
CTSD	CTSZ
CTSD	PIK3C3
DAB2IP	KRAS
EPOR	PDGFA
EPOR	IL15
EPOR	PIK3R1
EPOR	IRS2
EPOR	JAK1
ERBB3	PIK3R3
ERBB3	MTOR
ERBB3	PIK3R1
ERBB3	JAK1
ERBB3	PIK3CD
ERBB3	PIK3CA
ERBB3	KRAS
ERBB3	PIK3R2
ERBB3	PIK3CB
ERBB3	PDGFA
ERBB3	EREG
ERBB3	LAMB1
EREG	IGF1R
EREG	FGFR4
EREG	PIK3R1
EREG	KRAS
EREG	PIK3CA
FGFR4	PIK3CB
FGFR4	PIK3R2
FGFR4	PIK3R1
FGFR4	PIK3R3
FGFR4	PIK3CD
FGFR4	KRAS
FGFR4	PIK3CA
FGFR4	PIK3AP1
FGFR4	PDGFA
GNB5	PIK3R3
GNB5	PIK3CB
GNB5	KRAS
GNB5	PIK3R2
GNB5	GNG12
GNB5	PIK3CA
GNB5	PIK3CD
GNB5	GNGT2
GNB5	PIK3R1
GNB5	PIK3CG
GNB5	LPAR2
GNB5	GNG11
GNB5	LPAR4
GNB5	LPAR3
GNG11	PIK3R3
GNG11	PIK3CD
GNG11	LPAR4
GNG11	PIK3R2
GNG11	KRAS
GNG11	PIK3CB
GNG11	PIK3CA
GNG11	PIK3R1
GNG11	GNGT2
GNG11	PIK3CG
GNG11	LPAR3
GNG11	GNG12
GNG11	LPAR2
GNG12	PIK3R1
GNG12	PIK3CD
GNG12	PIK3CB
GNG12	PIK3CA
GNG12	KRAS
GNG12	PIK3R3
GNG12	LPAR3
GNG12	LPAR2
GNG12	GNGT2
GNG12	PIK3R2
GNG12	PIK3CG
GNG12	LPAR4
GNGT2	PIK3R3
GNGT2	PIK3CD
GNGT2	PIK3CB
GNGT2	PIK3R2
GNGT2	PIK3R1
GNGT2	PIK3CA
GNGT2	LPAR4
GNGT2	PIK3CG
GNGT2	LPAR3
GNGT2	KRAS
GNGT2	LPAR2
IGF1R	MTOR
IGF1R	ITGAV
IGF1R	PIK3CD
IGF1R	KRAS
IGF1R	PIK3R2
IGF1R	PIK3R3
IGF1R	PIK3CB
IGF1R	PDGFA
IGF1R	PIK3CA
IGF1R	ITGB1
IGF1R	PIK3R1
IGF1R	PIK3CG
IGF1R	JAK1
IGF1R	IRS2
IKBKB	MTOR
IKBKB	PPP2CA
IKBKB	IRS2
IKBKB	MAP3K7
IL10RA	IL2RG
IL10RA	PDGFA
IL10RA	JAK1
IL10RA	IL15
IL10RA	IL22RA1
IL12RB2	PDGFA
IL12RB2	JAK1
IL12RB2	NOS2
IL12RB2	IL15
IL15	JAK1
IL15	IL21R
IL15	MTOR
IL15	IL22RA1
IL15	IL2RG
IL15	LIFR
IL21R	IL2RG
IL21R	JAK1
IL21R	PDGFA
IL22RA1	PDGFA
IL22RA1	JAK1
IL2RG	PIK3CB
IL2RG	PIK3CD
IL2RG	JAK1
IL2RG	PIK3R1
IL2RG	KRAS
IL2RG	PIK3R3
IL2RG	PIK3R2
IL2RG	PDGFA
IL2RG	ITGA2B
IL2RG	PIK3CA
IL2RG	IRS2
IRF9	JAK1
IRS2	PIK3R2
IRS2	PIK3R3
IRS2	JAK1
IRS2	PIK3CD
IRS2	KRAS
IRS2	MTOR
IRS2	PIK3CB
IRS2	PIK3CA
IRS2	PIK3R1
IRS2	PIK3CG
ITGA11	LAMA2
ITGA11	ITGB6
ITGA11	ITGB1
ITGA11	LAMB1
ITGA11	ITGAV
ITGA11	ITGA2
ITGA2	PIK3CA
ITGA2	PIK3CB
ITGA2	ITGAV
ITGA2	PIK3R3
ITGA2	PIK3CD
ITGA2	LAMA2
ITGA2	ITGA2B
ITGA2	PIK3R2
ITGA2	PIK3R1
ITGA2	ITGB6
ITGA2	ITGB1
ITGA2	LAMB1
ITGA2B	PIK3CA
ITGA2B	LAMB1
ITGA2B	ITGB1
ITGA2B	LAMA2
ITGA2B	KRAS
ITGA2B	PIK3R1
ITGA2B	ITGAV
ITGA2B	JAK1
ITGA2B	ITGB6
ITGAV	PIK3CA
ITGAV	RAC1
ITGAV	LAMA2
ITGAV	PIK3R1
ITGAV	LAMB1
ITGAV	ITGB6
ITGAV	ITGB1
ITGB1	PIK3R3
ITGB1	PIK3R2
ITGB1	PIK3CA
ITGB1	PIK3CD
ITGB1	PIK3R1
ITGB1	PIK3CB
ITGB1	LAMA2
ITGB1	RAC1
ITGB1	ITGB6
ITGB1	LAMB1
ITGB6	LAMA2
ITGB6	LAMB1
JAK1	PIK3R1
JAK1	PIK3R2
JAK1	PIK3CB
JAK1	PIK3CA
JAK1	LIFR
JAK1	PIK3CD
JAK1	PIK3R3
JAK1	KRAS
JAK1	PDGFA
KRAS	PPP2CB
KRAS	PIK3R3
KRAS	PIK3CD
KRAS	PIK3CB
KRAS	PPP2R1A
KRAS	PIK3CG
KRAS	MTOR
KRAS	PPP2R5C
KRAS	PIK3R1
KRAS	PPP2CA
KRAS	PIK3R2
KRAS	PPP2R5E
KRAS	PIK3CA
KRAS	RAC1
KRAS	PPP2R5D
LAMA2	RAC1
LAMA2	LAMB1
LAMB1	PIK3R1
LAMB1	PIK3CA
LAMB1	RAC1
LIFR	PIK3R1
LIFR	PIK3R2
LIFR	PDGFA
LIFR	PIK3R3
LIFR	PIK3CA
LIFR	PIK3CD
LIFR	PIK3CB
LPAR2	PIK3R3
LPAR2	PIK3CG
LPAR2	PIK3R1
LPAR2	PIK3CA
LPAR2	PIK3CB
LPAR2	PIK3R2
LPAR2	LPAR4
LPAR2	LPAR3
LPAR3	PIK3R1
LPAR3	PIK3CA
LPAR3	PIK3R3
LPAR3	PIK3R2
LPAR3	LPAR4
LPAR3	PIK3CB
LPAR3	PIK3CG
LPAR4	PIK3R1
LPAR4	PIK3R2
LPAR4	PIK3CG
LPAR4	PIK3CA
LPAR4	PIK3R3
MTMR3	PIK3R2
MTMR3	PIK3R1
MTMR3	MTMR4
MTMR3	PIK3C3
MTMR3	PIK3R3
MTMR4	PIK3R2
MTMR4	PIK3R1
MTMR4	PIK3C3
MTMR4	PIK3R3
MTOR	SGK2
MTOR	PIK3CB
MTOR	PIK3R1
MTOR	PIK3CD
MTOR	RPS6KB2
MTOR	PPP2R5D
MTOR	PPP2CA
MTOR	PIK3CA
MTOR	PIK3R2
MTOR	SGK3
MTOR	PIK3R3
MTOR	PIK3CG
NOS2	NOS3
PDGFA	PIK3R1
PDGFA	PIK3CA
PDHB	PFKP
PIK3AP1	PIK3R2
PIK3AP1	PIK3CA
PIK3AP1	PIK3CD
PIK3AP1	PIK3CB
PIK3AP1	PIK3R3
PIK3AP1	PIK3R1
PIK3C3	PIK3R3
PIK3C3	PIK3CA
PIK3C3	PIK3R2
PIK3C3	SGK3
PIK3C3	PIK3CB
PIK3C3	PIK3R1
PIK3C3	PIK3CG
PIK3C3	PIK3CD
PIK3CA	PIK3R3
PIK3CA	PIK3CB
PIK3CA	RAC1
PIK3CA	PIK3CD
PIK3CA	PIK3R1
PIK3CA	PIK3R2
PIK3CA	PPP2R1A
PIK3CA	SGK2
PIK3CA	RPS6KB2
PIK3CA	PIK3CG
PIK3CA	SGK3
PIK3CB	PIK3R3
PIK3CB	PIK3CD
PIK3CB	PIK3R1
PIK3CB	PIK3R2
PIK3CB	PIK3CG
PIK3CB	RAC1
PIK3CD	PIK3R2
PIK3CD	PIK3R3
PIK3CD	PIK3R1
PIK3CD	PIK3CG
PIK3CD	RAC1
PIK3CG	PIK3R3
PIK3CG	PIK3R1
PIK3CG	PIK3R2
PIK3R1	PIK3R2
PIK3R1	PIK3R3
PIK3R1	RAC1
PIK3R2	PIK3R3
PIK3R2	RAC1
PIK3R3	RAC1
PPP2CA	RPS6KB2
PPP2CA	PPP2CB
PPP2CA	PPP2R5E
PPP2CA	PPP2R1A
PPP2CA	PPP2R5D
PPP2CA	PPP2R5C
PPP2CA	PPP2R3C
PPP2CA	PPP2R3B
PPP2CB	PPP2R5E
PPP2CB	RPS6KB2
PPP2CB	PPP2R5D
PPP2CB	PPP2R3B
PPP2CB	PPP2R5C
PPP2CB	PPP2R1A
PPP2CB	PPP2R3C
PPP2R1A	PPP2R5C
PPP2R1A	PPP2R5D
PPP2R1A	RPS6KB2
PPP2R1A	PPP2R5E
PPP2R1A	PPP2R3C
PPP2R1A	PPP2R3B
PPP2R3B	PPP2R5E
PPP2R3B	PPP2R5C
PPP2R3B	PPP2R5D
PPP2R3C	PPP2R5C
PPP2R3C	PPP2R5D
PPP2R3C	PPP2R5E
PPP2R5C	PPP2R5D
PPP2R5C	PPP2R5E
PPP2R5D	PPP2R5E
